# Supplementary material
Source: Springer Nature journal article supplement (https://www.springermedizin.de/resource/supplementary/13018_2010_252_MOESM15_ESM.pdf/9636630)

Review: Is Surgical Intervention More Effective Than Non-surgical Treatment for CTS  
 Comparison: 08 Surgery vs non surgery: complication and side effect  
 Outcome: 01 complication and side effect

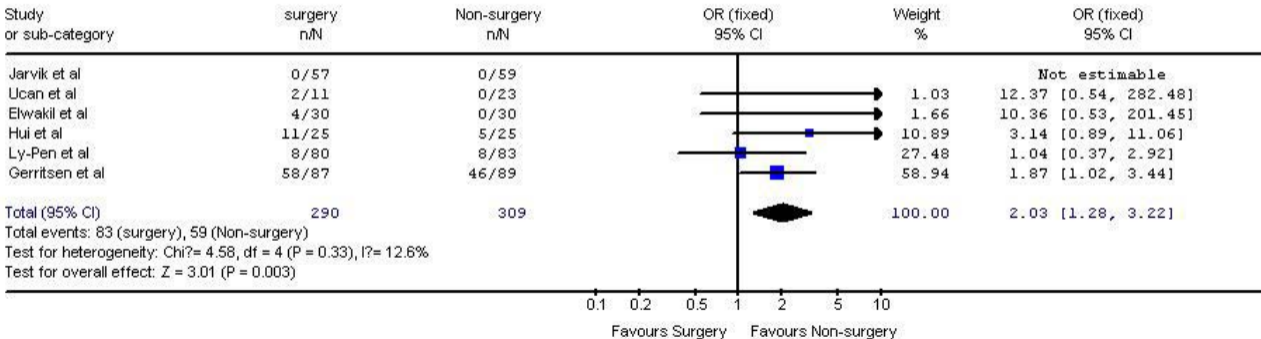

Supplement: MOESM15 [file 9636630]
